# Supplementary material
Source: PubMed Central journal article supplement (PMC3327868)
Supplement: supp_kfs085_TableS1.pdf [file supp_kfs085_TableS1.pdf]

**Table S1. Figure 1 Tests**

| Cell Line  | R <sup>2</sup> for full model | <u>Comparisons within each level of the other factor</u> |                                   |                                      |                                   |                                      |                                      | <u>Main Effects</u>                   |                                     |
|------------|-------------------------------|----------------------------------------------------------|-----------------------------------|--------------------------------------|-----------------------------------|--------------------------------------|--------------------------------------|---------------------------------------|-------------------------------------|
|            |                               | Overall Test                                             | Interaction                       | CPA 39 vs CP 39                      | CPA 37 vs CP 37                   | CPA 39 vs CPA 37                     | CP 39 vs CP 37                       | 39 vs 37                              | CPA vs CP                           |
| A2780      | 0.998                         | (34.6, 9, <2.2 x 10 <sup>-16</sup> )                     | (7.8, 3, 8.6 x 10 <sup>-5</sup> ) | (34.6, 3, <2.2 x 10 <sup>-16</sup> ) | (5.2, 3, 0.002)                   | (55.6, 3, <2.2 x 10 <sup>-16</sup> ) | (13.2, 3, 1.6 x 10 <sup>-7</sup> )   | (52.4, 3, <2.2 x 10 <sup>-16</sup> )  | (29.9, 3, 1.3 x 10 <sup>-14</sup> ) |
| A2780/CP70 | 0.996                         | (15.3, 9, 5.6 x 10 <sup>-16</sup> )                      | (1.5, 3, 0.22)                    | (11.7, 3, 9.8 x 10 <sup>-7</sup> )   | (4.04, 3, 0.009)                  | (20.8, 3, 8.5 x 10 <sup>-11</sup> )  | (10.7, 3, 3.1 x 10 <sup>-6</sup> )   | (29.7, 3, 3.0 x 10 <sup>-14</sup> )   | (14.1, 3, 7 x 10 <sup>-8</sup> )    |
| OVCA 420   | 0.997                         | (31.4, 9, <2.2 x 10 <sup>-16</sup> )                     | (1.5, 3, 0.23)                    | (11.4, 3, 1.0 x 10 <sup>-6</sup> )   | (3.6, 3, 0.015)                   | (50.6, 3, <2.2 x 10 <sup>-16</sup> ) | (30.08, 3, 6.9 x 10 <sup>-15</sup> ) | (78.4, 3, <2.2 x 10 <sup>-16</sup> )  | (13.4, 3, 1 x 10 <sup>-7</sup> )    |
| OVCA 429   | 0.998                         | (20.5, 9, <2.2 x 10 <sup>-16</sup> )                     | (6.2, 3, 4.7 x 10 <sup>-4</sup> ) | (22.5, 3, 8.6 x 10 <sup>-13</sup> )  | (1.8, 3, 0.15)                    | (36.6, 3, <2.2 x 10 <sup>-16</sup> ) | (6.8, 3, 1.9 x 10 <sup>-4</sup> )    | (35.0, 3, <2.2 x 10 <sup>-16</sup> )  | (17.0, 3, 5.3 x 10 <sup>-10</sup> ) |
| OVCA 433   | 0.998                         | (22.3, 9, <2.2 x 10 <sup>-16</sup> )                     | (1.1, 3, 0.36)                    | (17.0, 3, 1.7 x 10 <sup>-9</sup> )   | (9.7, 3, 7.2 x 10 <sup>-6</sup> ) | (25.7, 3, 2.3 x 10 <sup>-13</sup> )  | (15.6, 3, 7.3 x 10 <sup>-9</sup> )   | (40.2, 3, <2.2 x 10 <sup>-16</sup> )  | (25.5, 3, 2.4 x 10 <sup>-13</sup> ) |
| SKOV-3     | 0.997                         | (9.74, 9, 4.7 x 10 <sup>-10</sup> )                      | (0.84, 3, 0.47)                   | (3.3, 3, 0.022)                      | (0.70, 3, 0.55)                   | (17.3, 3, 7.4 x 10 <sup>-9</sup> )   | (8.6, 3, 4.5 x 10 <sup>-5</sup> )    | (25.3, 3, 7.3 x 10 <sup>-12</sup> )   | (3.2, 3, 0.027)                     |
| OVCAR-3    | 0.996                         | (21, 9, <2.2 x 10 <sup>-16</sup> )                       | (2.4, 3, 0.08)                    | (8.0, 3, 9.1 x 10 <sup>-5</sup> )    | (0.68, 3, 0.56)                   | (21.2, 3, 2.5 x 10 <sup>-10</sup> )  | (35.4, 3, 6.6 x 10 <sup>-15</sup> )  | (51.8, 3, <2.2 x 10 <sup>-16</sup> )  | (6.0, 3, 8.7 x 10 <sup>-4</sup> )   |
| OVCA 432   | 0.999                         | (42.3, 9, <2.2 x 10 <sup>-16</sup> )                     | (2.2, 3, 0.09)                    | (4.2, 3, 6.8 x 10 <sup>-3</sup> )    | (2.8, 3, 0.04)                    | (57.9, 3, <2.2 x 10 <sup>-16</sup> ) | (64.4, 3, <2.2 x 10 <sup>-16</sup> ) | (117.5, 3, <2.2 x 10 <sup>-16</sup> ) | (4.67, 3, 0.0036)                   |

Entries in parentheses are (F-statistic, numerator degrees of freedom, p-value)
