# Supplementary material
Source: PubMed Central journal article supplement (PMC3327868)
Supplement: supp_kfs085_TableS2.pdf [file supp_kfs085_TableS2.pdf]

**Table S2. Figure 2 Tests**

| <u>Cell Line</u> | <u>Treatment</u> |                                  |                                  |
|------------------|------------------|----------------------------------|----------------------------------|
|                  | <u>p53 siRNA</u> | <u>NSC</u>                       | <u>Mock</u>                      |
| A2780            | (0.44, 3, 0.73)  | (1.9, 3, 0.15)                   | (5.4, 3, 0.003)                  |
| A2780/CP70       | (0.03, 3, 0.99)  | (22.6, 3, $7.4 \times 10^{-9}$ ) | (15.6, 3, $5.7 \times 10^{-7}$ ) |

Entries in parentheses are (F-statistic, numerator degrees of freedom, p-value), for tests of significant differences between arsenite treated (CPA) and untreated (CP) regression curves, as displayed in Figure 2 of the manuscript.
