# Supplementary material
Source: PubMed Central journal article supplement (PMC3327868)
Supplement: supp_kfs085_TableS3.pdf [file supp_kfs085_TableS3.pdf]

**Table S3. Figure 4 Tests**

| <u>Cell Line</u> | <u>R<sup>2</sup> for full model</u> | <u>Overall Test</u>                  | <u>Individual Comparisons</u>        |                                      |                    |
|------------------|-------------------------------------|--------------------------------------|--------------------------------------|--------------------------------------|--------------------|
|                  |                                     |                                      | <u>XPC siRNA vs NSC</u>              | <u>XPC siRNA vs Mock</u>             | <u>NSC vs Mock</u> |
| A2780            | 0.995                               | (32.9, 6, <2.2 x 10 <sup>-16</sup> ) | (38.1, 3, <2.2 x 10 <sup>-16</sup> ) | (58.4, 3, <2.2 x 10 <sup>-16</sup> ) | (2.22, 3, 0.088)   |
| A2780/CP70       | 0.999                               | (33.4, 6, <2.2 x 10 <sup>-16</sup> ) | (41.8, 3, <2.2 x 10 <sup>-16</sup> ) | (56.8, 3, <2.2 x 10 <sup>-16</sup> ) | (1.81, 3, 0.15)    |

Entries in parentheses are (F-statistic, numerator degrees of freedom, p-value)
