# Supplementary material
Source: PubMed Central journal article supplement (PMC3327868)
Supplement: supp_kfs085_TableS4.pdf [file supp_kfs085_TableS4.pdf]

**Table S4. Figure 5a Tests**

| <u>R<sup>2</sup> for full model</u> | <u>Overall Test</u>                | <u>Individual Comparisons</u>      |                                    |                        |
|-------------------------------------|------------------------------------|------------------------------------|------------------------------------|------------------------|
|                                     |                                    | <u>A2780 vs A2780/CP70</u>         | <u>A2780/CP70 vs SKOV-3</u>        | <u>A2780 vs SKOV-3</u> |
| 0.948                               | (20.4, 4, 2.7 x 10 <sup>-9</sup> ) | (32.3, 2, 3.8 x 10 <sup>-9</sup> ) | (26.5, 2, 4.0 x 10 <sup>-8</sup> ) | (0.87, 2, 0.97)        |

Entries in parentheses are (F-statistic, numerator degrees of freedom, p-value)
